# Supplementary material
Source: PubMed Central journal article supplement (PMC3262143)

# THE LANCET

## **Supplementary webappendix**

This webappendix formed part of the original submission and has been peer reviewed.  
We post it as supplied by the authors.

Supplement to: Agarwal R, Teoh S, Short D, Harvey R, Savage PM, Seckl MJ.  
Chemotherapy and human chorionic gonadotropin concentrations 6 months after  
uterine evacuation of molar pregnancy: a retrospective cohort study. *Lancet* 2011;  
published online Nov 29. DOI:10.1016/S0140-6736(11)61265-8.

**Supplementary Table 1**

**Characteristics of patients with an elevated hCG 6 months after uterine evacuation at diagnosis and at 6 months**

|                                                                               |                 | Surveillance (n=66) | Chemotherapy (n=10) | All Patients (n=76) | p-value |
|-------------------------------------------------------------------------------|-----------------|---------------------|---------------------|---------------------|---------|
| <b>Age*</b>                                                                   | <b>median</b>   | 29.5                | 30                  | 30                  | 0.890   |
|                                                                               | <b>range</b>    | 15-51               | 19-41               | 15-51               |         |
| <b>Mole histology~</b>                                                        | <b>Complete</b> | 38                  | 8                   | 46                  | 0.357   |
|                                                                               | <b>Partial</b>  | 23                  | 2                   | 25                  |         |
|                                                                               | <b>NOS</b>      | 5                   | 0                   | 5                   |         |
| <b>Year of diagnosis~</b>                                                     | <b>1993-95</b>  | 10                  | 3                   | 13                  | 0.310   |
|                                                                               | <b>1996-00</b>  | 30                  | 4                   | 34                  |         |
|                                                                               | <b>2000-05</b>  | 13                  | 3                   | 16                  |         |
|                                                                               | <b>2005-08</b>  | 13                  | 0                   | 13                  |         |
| <b>hCG at evacuation (IU/L)*</b>                                              | <b>median</b>   | 1381                | 891.50              | 1343.5              | 0.512   |
|                                                                               | <b>range</b>    | 7-1809437           | 9-618153            | 7-1809437           |         |
| <b>Peak hCG (IU/L)*</b>                                                       | <b>median</b>   | 1642.00             | 602.00              | 1386                | 0.612   |
|                                                                               | <b>range</b>    | 6-1809437           | 14-618153           | 7-1809437           |         |
| <b>hCG at 6 months (IU/L)*</b>                                                | <b>median</b>   | 12.50               | 157.00              | 13.5                | 0.004   |
|                                                                               | <b>range</b>    | 3-887               | 6-6438              | 3-6438              |         |
| <b>Time to hCG normalisation (months)*#</b><br><b>from uterine evacuation</b> | <b>median</b>   | 7.4                 | 9.4                 | 7.5                 | 0.079   |
|                                                                               | <b>range</b>    | 6.1-32.2            | 6.3-23.6            | 6.1-32.2            |         |

\*p-value for Mann-whitney U test, ~p-value-sq test, # only patients with hCG normalisation included

**Supplementary Figure 1**

**Flow diagram showing type of HM in patients with an elevated hCG 6 months after evacuation who received chemotherapy**

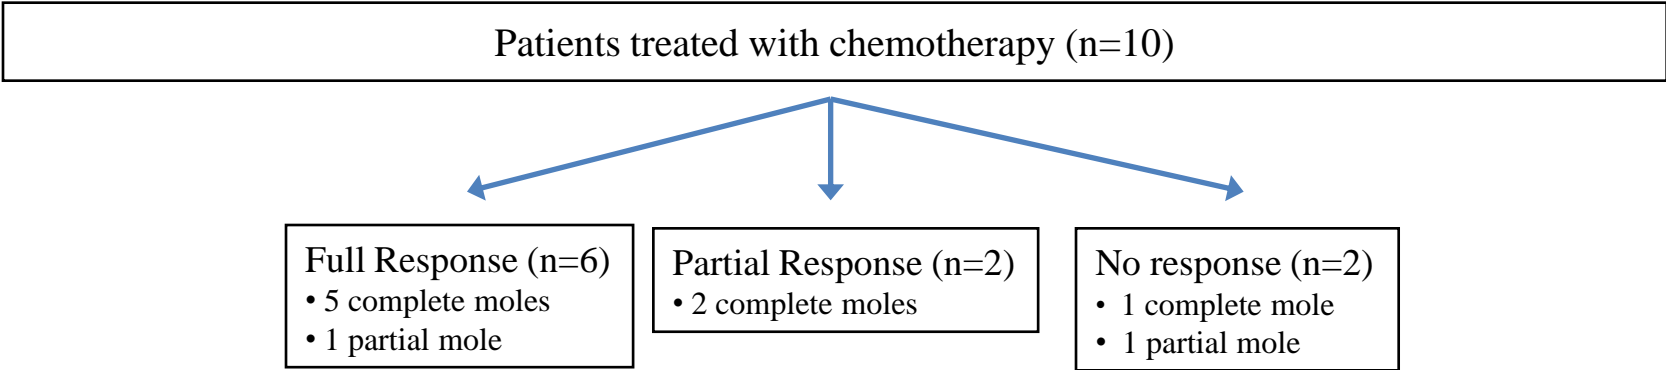

hCG- human chorionic gonadotrophin, HM - hydatidiform mole

Supplementary Figure 2

Kaplan-Meier curves of time to hCG normalization in patients on surveillance or chemotherapy

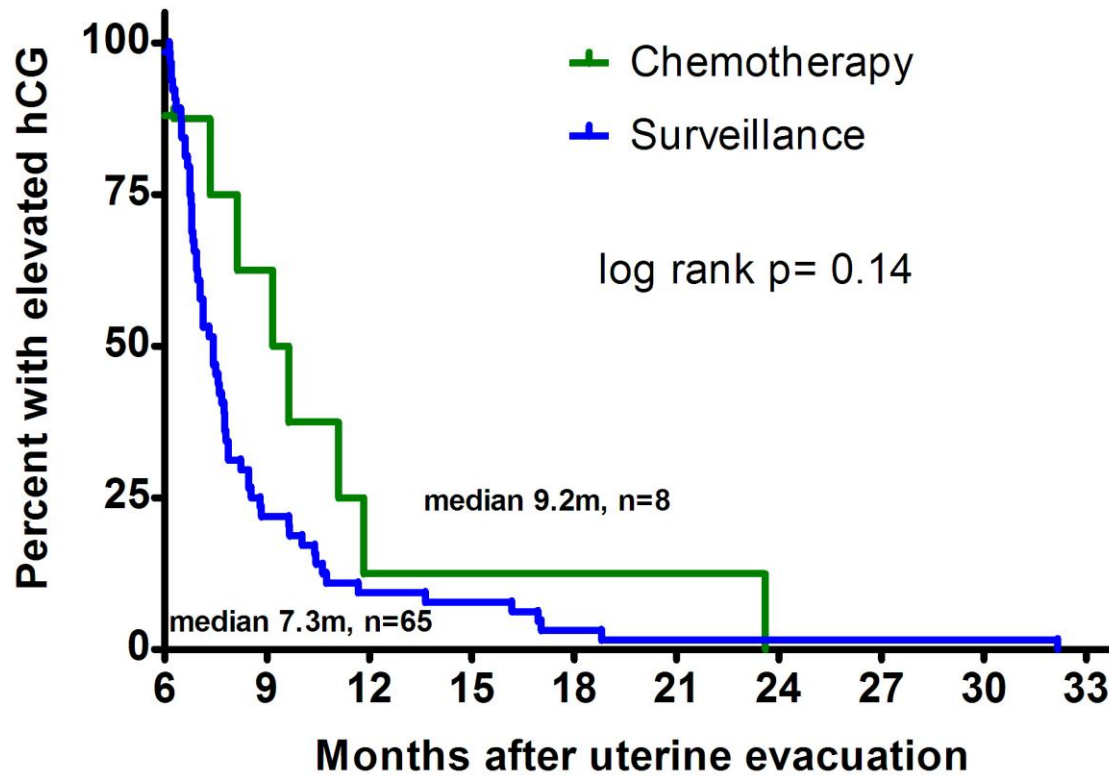

Supplement: mmc1.pdf [file mmc1.pdf]
